# Supplementary material for: Long-term patient-reported outcomes following congenital heart surgery in adults
Source: Front Cardiovasc Med. 2024 Dec 11;11:1501680. doi: 10.3389/fcvm.2024.1501680 (PMC11668799; doi:10.3389/fcvm.2024.1501680)
Supplement: Supplementary file 1 [file Datasheet1.pdf]

## Fragebogen zum Allgemeinen Gesundheitszustand VR-12

In diesem Fragebogen geht es um die Beurteilung Ihres Gesundheitszustandes. Ihre Angaben ermöglichen es nachzuvollziehen, wie Sie sich fühlen und wie gut Sie Ihre Alltagstätigkeiten ausüben können.

Bitte beantworten Sie jede Frage, indem Sie die Antwortmöglichkeit ankreuzen, die am besten auf Sie zutrifft. Wenn Sie sich bei der Antwort auf eine Frage unsicher sind, beantworten Sie diese bitte so gut wie möglich.

|                                                                              | aus-<br>gezeichnet       | sehr gut                 | gut                      | weniger<br>gut           | schlecht                 |
|------------------------------------------------------------------------------|--------------------------|--------------------------|--------------------------|--------------------------|--------------------------|
| 1. Wie würden Sie Ihren Gesundheitszustand im Allgemeinen beschreiben? ..... | <input type="checkbox"/> |

In den folgenden Fragen geht es um Tätigkeiten, die Sie vielleicht im Laufe eines normalen Tages ausüben. Sind Sie derzeit aufgrund Ihrer Gesundheit bei diesen Tätigkeiten eingeschränkt? Wenn ja, wie stark?

|                                                                                               | ja, stark<br>eingeschränkt | ja, etwas<br>eingeschränkt | nein, überhaupt<br>nicht<br>eingeschränkt |
|-----------------------------------------------------------------------------------------------|----------------------------|----------------------------|-------------------------------------------|
| 2. <b>mittelschwere Tätigkeiten</b> , z.B. einen Tisch verschieben, staubsaugen, kegeln ..... | <input type="checkbox"/>   | <input type="checkbox"/>   | <input type="checkbox"/>                  |
| 3. <b>mehrere Treppenabsätze</b> steigen .....                                                | <input type="checkbox"/>   | <input type="checkbox"/>   | <input type="checkbox"/>                  |

Hatten Sie in den vergangenen 4 Wochen aufgrund Ihrer **körperlichen** Gesundheit die folgenden Probleme bei der Arbeit oder bei anderen Alltagstätigkeiten?

|                                                                              | nie                      | selten                   | manchmal                 | meistens                 | immer                    |
|------------------------------------------------------------------------------|--------------------------|--------------------------|--------------------------|--------------------------|--------------------------|
| 4. Ich habe weniger geschafft als ich wollte .....                           | <input type="checkbox"/> |
| 5. Ich konnte nur bestimmte Arbeiten oder andere Tätigkeiten ausführen ..... | <input type="checkbox"/> |

Hatten Sie in den vergangenen 4 Wochen aufgrund **seelischer** Probleme die folgenden Schwierigkeiten bei der Arbeit oder bei anderen Alltagstätigkeiten (z.B. weil Sie sich niedergeschlagen oder ängstlich fühlten)?

|                                                                                                  | nie                      | selten                   | manchmal                 | meistens                 | immer                    |
|--------------------------------------------------------------------------------------------------|--------------------------|--------------------------|--------------------------|--------------------------|--------------------------|
| 6. Ich habe weniger geschafft als ich wollte .....                                               | <input type="checkbox"/> |
| 7. Ich konnte meine Arbeit oder andere Tätigkeiten nicht so sorgfältig wie sonst erledigen ..... | <input type="checkbox"/> |

|                                                                                                                                | überhaupt<br>nicht       | ein wenig                | mäßig                    | ziemlich                 | sehr                     |
|--------------------------------------------------------------------------------------------------------------------------------|--------------------------|--------------------------|--------------------------|--------------------------|--------------------------|
| 8. Inwieweit haben Schmerzen in den vergangenen 4 Wochen Ihre Alltagstätigkeiten (im Beruf und zu Hause) beeinträchtigt? ..... | <input type="checkbox"/> |

In diesen Fragen geht es darum, wie Sie sich in den vergangenen 4 Wochen gefühlt haben und wie es Ihnen ergangen ist. Bitte kreuzen Sie bei jeder Frage die Antwort an, die am besten beschreibt, wie Sie sich gefühlt haben.

|                                                                 | immer                    | meistens                 | ziemlich<br>oft          | manchmal                 | selten                   | nie                      |
|-----------------------------------------------------------------|--------------------------|--------------------------|--------------------------|--------------------------|--------------------------|--------------------------|
| Wie oft fühlten Sie sich <u>in den vergangenen 4 Wochen</u> ... |                          |                          |                          |                          |                          |                          |
| 9. ruhig und gelassen? .....                                    | <input type="checkbox"/> |
| 10. voller Energie? .....                                       | <input type="checkbox"/> |
| 11. entmutigt und traurig? .....                                | <input type="checkbox"/> |

|                                                                                                                                                                                                              | immer                    | meistens                 | manchmal                 | selten                   | nie                      |
|--------------------------------------------------------------------------------------------------------------------------------------------------------------------------------------------------------------|--------------------------|--------------------------|--------------------------|--------------------------|--------------------------|
| 12. Wie häufig haben Ihre körperliche Gesundheit oder seelischen Probleme <u>in den vergangenen 4 Wochen</u> Ihre Kontakte zu anderen Menschen (Besuche bei Freunden, Verwandten usw.) beeinträchtigt? ..... | <input type="checkbox"/> |

## EuroQol Group EQ-5D-5L

Bitte kreuzen Sie unter jeder Überschrift DAS Kästchen an, das Ihre Gesundheit HEUTE am besten beschreibt.

### **BEWEGLICHKEIT / MOBILITÄT**

- Ich habe keine Probleme herumzugehen ☐
- Ich habe leichte Probleme herumzugehen ☐
- Ich habe mäßige Probleme herumzugehen ☐
- Ich habe große Probleme herumzugehen ☐
- Ich bin nicht in der Lage herumzugehen ☐

### **FÜR SICH SELBST SORGEN**

- Ich habe keine Probleme, mich selbst zu waschen oder anzuziehen ☐
- Ich habe leichte Probleme, mich selbst zu waschen oder anzuziehen ☐
- Ich habe mäßige Probleme, mich selbst zu waschen oder anzuziehen ☐
- Ich habe große Probleme, mich selbst zu waschen oder anzuziehen ☐
- Ich bin nicht in der Lage, mich selbst zu waschen oder anzuziehen ☐

### **ALLTÄGLICHE TÄTIGKEITEN** (z.B. Arbeit, Studium, Hausarbeit, Familien- oder Freizeitaktivitäten)

- Ich habe keine Probleme, meinen alltäglichen Tätigkeiten nachzugehen ☐
- Ich habe leichte Probleme, meinen alltäglichen Tätigkeiten nachzugehen ☐
- Ich habe mäßige Probleme, meinen alltäglichen Tätigkeiten nachzugehen ☐
- Ich habe große Probleme, meinen alltäglichen Tätigkeiten nachzugehen ☐
- Ich bin nicht in der Lage, meinen alltäglichen Tätigkeiten nachzugehen ☐

### **SCHMERZEN / KÖRPERLICHE BESCHWERDEN**

- Ich habe keine Schmerzen oder Beschwerden ☐
- Ich habe leichte Schmerzen oder Beschwerden ☐
- Ich habe mäßige Schmerzen oder Beschwerden ☐
- Ich habe starke Schmerzen oder Beschwerden ☐
- Ich habe extreme Schmerzen oder Beschwerden ☐

### **ANGST / NIEDERGESCHLAGENHEIT**

- Ich bin nicht ängstlich oder deprimiert ☐
- Ich bin ein wenig ängstlich oder deprimiert ☐
- Ich bin mäßig ängstlich oder deprimiert ☐
- Ich bin sehr ängstlich oder deprimiert ☐
- Ich bin extrem ängstlich oder deprimiert ☐

- Wir wollen herausfinden, wie gut oder schlecht Ihre Gesundheit HEUTE ist.
- Diese Skala ist mit Zahlen von 0 bis 100 versehen.
- 100 ist die beste Gesundheit, die Sie sich vorstellen können. 0 (Null) ist die schlechteste Gesundheit, die Sie sich vorstellen können.
- Bitte kreuzen Sie den Punkt auf der Skala an, der Ihre Gesundheit HEUTE am besten beschreibt.
- Jetzt tragen Sie bitte die Zahl, die Sie auf der Skala angekreuzt haben, in das Kästchen unten ein.

IHRE GESUNDHEIT HEUTE =

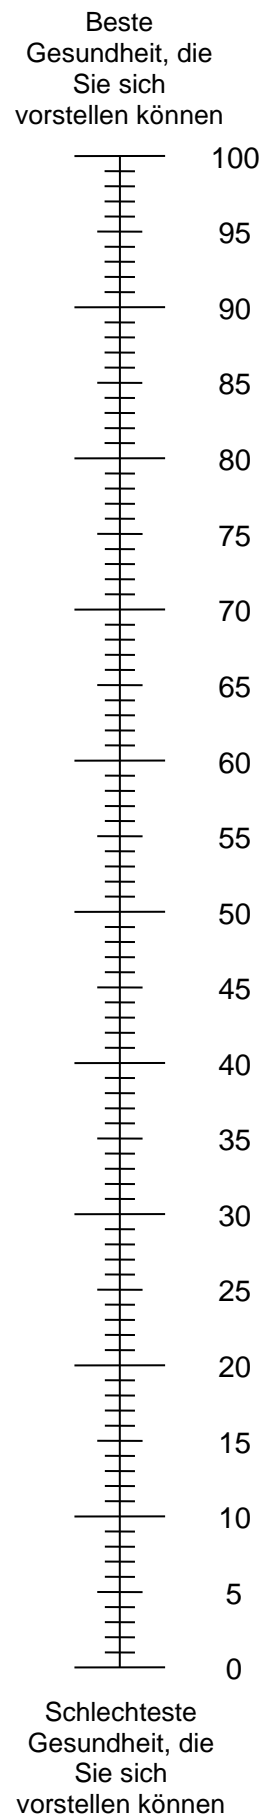

### Deutsche Version der Satisfaction with Life Scale (SWLS)

Es folgen fünf Aussagen, denen Sie zustimmen bzw. die Sie ablehnen können. Bitte benutzen Sie die folgende Skala von 1-7, um Ihre Zustimmung bzw. Ablehnung zu jeder Aussage zum Ausdruck zu bringen.

|                                                                                      | trifft<br>überhaupt<br>nicht zu | trifft<br>nicht zu    | trifft<br>eher<br>nicht zu | teils/<br>teils       | trifft<br>eher zu     | trifft zu             | trifft<br>vollständig<br>zu |
|--------------------------------------------------------------------------------------|---------------------------------|-----------------------|----------------------------|-----------------------|-----------------------|-----------------------|-----------------------------|
| In den meisten Bereichen entspricht mein Leben meinen Idealvorstellungen.            | <input type="radio"/>           | <input type="radio"/> | <input type="radio"/>      | <input type="radio"/> | <input type="radio"/> | <input type="radio"/> | <input type="radio"/>       |
| Meine Lebensbedingungen sind ausgezeichnet.                                          | <input type="radio"/>           | <input type="radio"/> | <input type="radio"/>      | <input type="radio"/> | <input type="radio"/> | <input type="radio"/> | <input type="radio"/>       |
| Ich bin mit meinem Leben zufrieden.                                                  | <input type="radio"/>           | <input type="radio"/> | <input type="radio"/>      | <input type="radio"/> | <input type="radio"/> | <input type="radio"/> | <input type="radio"/>       |
| Bisher habe ich die wesentlichen Dinge erreicht, die ich mir für mein Leben wünsche. | <input type="radio"/>           | <input type="radio"/> | <input type="radio"/>      | <input type="radio"/> | <input type="radio"/> | <input type="radio"/> | <input type="radio"/>       |
| Wenn ich mein Leben noch einmal leben könnte, würde ich kaum etwas ändern.           | <input type="radio"/>           | <input type="radio"/> | <input type="radio"/>      | <input type="radio"/> | <input type="radio"/> | <input type="radio"/> | <input type="radio"/>       |

## Gesundheitsfragebogen für Patienten (PHQ-8)

| Wie oft fühlten Sie sich im Verlauf der <u>letzten 2 Wochen</u> durch die folgenden Beschwerden beeinträchtigt?                                                                                                | Überhaupt nicht               | An einzelnen Tagen            | An mehr als der Hälfte der Tage | Beinahe jeden Tag             |
|----------------------------------------------------------------------------------------------------------------------------------------------------------------------------------------------------------------|-------------------------------|-------------------------------|---------------------------------|-------------------------------|
| Wenig Interesse oder Freude an Ihren Tätigkeiten                                                                                                                                                               | <input type="checkbox"/><br>0 | <input type="checkbox"/><br>1 | <input type="checkbox"/><br>2   | <input type="checkbox"/><br>3 |
| Niedergeschlagenheit, Schwermut oder Hoffnungslosigkeit.                                                                                                                                                       | <input type="checkbox"/><br>0 | <input type="checkbox"/><br>1 | <input type="checkbox"/><br>2   | <input type="checkbox"/><br>3 |
| Schwierigkeiten ein- oder durchzuschlafen oder vermehrter Schlaf                                                                                                                                               | <input type="checkbox"/><br>0 | <input type="checkbox"/><br>1 | <input type="checkbox"/><br>2   | <input type="checkbox"/><br>3 |
| Müdigkeit oder Gefühl, keine Energie zu haben                                                                                                                                                                  | <input type="checkbox"/><br>0 | <input type="checkbox"/><br>1 | <input type="checkbox"/><br>2   | <input type="checkbox"/><br>3 |
| Verminderter Appetit oder übermäßiges Bedürfnis zu essen                                                                                                                                                       | <input type="checkbox"/><br>0 | <input type="checkbox"/><br>1 | <input type="checkbox"/><br>2   | <input type="checkbox"/><br>3 |
| Schlechte Meinung von sich selbst; Gefühl, ein Versager zu sein oder die Familie enttäuscht zu haben                                                                                                           | <input type="checkbox"/><br>0 | <input type="checkbox"/><br>1 | <input type="checkbox"/><br>2   | <input type="checkbox"/><br>3 |
| Schwierigkeiten, sich auf etwas zu konzentrieren, z.B. beim Zeitunglesen oder Fernsehen                                                                                                                        | <input type="checkbox"/><br>0 | <input type="checkbox"/><br>1 | <input type="checkbox"/><br>2   | <input type="checkbox"/><br>3 |
| Waren Ihre Bewegungen oder Ihre Sprache so verlangsamt, dass es auch anderen auffallen würde? Oder waren Sie im Gegenteil „zappelig“ oder ruhelos und hatten dadurch einen stärkeren Bewegungsdrang als sonst? | <input type="checkbox"/><br>0 | <input type="checkbox"/><br>1 | <input type="checkbox"/><br>2   | <input type="checkbox"/><br>3 |

Gesamtwert \_\_\_\_\_ = Addition \_\_\_\_\_ + \_\_\_\_\_ + \_\_\_\_\_  
der Spaltensummen

## SOC-13

Im folgenden finden Sie eine Reihe von Fragen und Aussagen zu verschiedenen Aspekten des Lebens. Bitte **kreuzen** Sie zu jeder Frage die für Sie **persönlich zutreffende Antwort** (Zahl zwischen ① und ⑦) an. Bitte beantworten Sie **jede** Frage bzw. Aussage und kreuzen Sie **jeweils nur eine** Zahl an.

- 
- |    |                                                                                           |   |   |   |   |   |   |          |
|----|-------------------------------------------------------------------------------------------|---|---|---|---|---|---|----------|
| 1. | Haben Sie das Gefühl, dass es Ihnen ziemlich gleichgültig ist, was um Sie herum passiert? | ① | ② | ③ | ④ | ⑤ | ⑥ | ⑦        |
|    | sehr selten oder nie                                                                      |   |   |   |   |   |   | sehr oft |
- 
- |    |                                                                                                                                |   |   |   |   |   |   |                               |
|----|--------------------------------------------------------------------------------------------------------------------------------|---|---|---|---|---|---|-------------------------------|
| 2. | Ist es in der Vergangenheit vorgekommen, dass Sie vom Verhalten von Menschen überrascht waren, die Sie gut zu kennen glaubten? | ① | ② | ③ | ④ | ⑤ | ⑥ | ⑦                             |
|    | das ist nie passiert                                                                                                           |   |   |   |   |   |   | das ist immer wieder passiert |
- 
- |    |                                                                                          |   |   |   |   |   |   |                               |
|----|------------------------------------------------------------------------------------------|---|---|---|---|---|---|-------------------------------|
| 3. | Ist es vorgekommen, dass Sie von Menschen enttäuscht wurden, auf die Sie gezählt hatten? | ① | ② | ③ | ④ | ⑤ | ⑥ | ⑦                             |
|    | das ist nie passiert                                                                     |   |   |   |   |   |   | das ist immer wieder passiert |
- 
- |    |                              |   |   |   |   |   |   |                  |
|----|------------------------------|---|---|---|---|---|---|------------------|
| 4. | Bis jetzt hatte Ihr Leben... | ① | ② | ③ | ④ | ⑤ | ⑥ | ⑦                |
|    | überhaupt keine klaren Ziele |   |   |   |   |   |   | sehr klare Ziele |
- 
- |    |                                                            |   |   |   |   |   |   |                 |
|----|------------------------------------------------------------|---|---|---|---|---|---|-----------------|
| 5. | Haben Sie das Gefühl, dass Sie ungerecht behandelt werden? | ① | ② | ③ | ④ | ⑤ | ⑥ | ⑦               |
|    | sehr oft                                                   |   |   |   |   |   |   | selten oder nie |
- 
- |    |                                                                                                          |   |   |   |   |   |   |                      |
|----|----------------------------------------------------------------------------------------------------------|---|---|---|---|---|---|----------------------|
| 6. | Haben Sie das Gefühl, dass Sie in einer ungewohnten Situation sind und nicht wissen, was Sie tun sollen? | ① | ② | ③ | ④ | ⑤ | ⑥ | ⑦                    |
|    | sehr oft                                                                                                 |   |   |   |   |   |   | sehr selten oder nie |
- 
- |    |                                                  |   |   |   |   |   |   |                                         |
|----|--------------------------------------------------|---|---|---|---|---|---|-----------------------------------------|
| 7. | Die Dinge, die Sie täglich tun, sind für Sie ... | ① | ② | ③ | ④ | ⑤ | ⑥ | ⑦                                       |
|    | eine Quelle tiefer Freude und Befriedigung.      |   |   |   |   |   |   | eine Quelle von Schmerz und Langeweile. |
-

|     |                                                                                                                                                                               |   |   |   |   |                         |   |
|-----|-------------------------------------------------------------------------------------------------------------------------------------------------------------------------------|---|---|---|---|-------------------------|---|
| 8.  | Wie oft sind Ihre Gedanken und Gefühle ganz durcheinander?                                                                                                                    |   |   |   |   |                         |   |
|     | ①                                                                                                                                                                             | ② | ③ | ④ | ⑤ | ⑥                       | ⑦ |
|     | sehr oft                                                                                                                                                                      |   |   |   |   | sehr selten<br>oder nie |   |
| 9.  | Kommt es vor, dass Sie Gefühle in sich haben, die Sie lieber nicht spüren würden?                                                                                             |   |   |   |   |                         |   |
|     | ①                                                                                                                                                                             | ② | ③ | ④ | ⑤ | ⑥                       | ⑦ |
|     | sehr oft                                                                                                                                                                      |   |   |   |   | sehr selten<br>oder nie |   |
| 10. | Viele Leute - auch solche mit einem starken Charakter - fühlen sich in bestimmten Situationen als traurige Verlierer. Wie oft haben Sie sich in der Vergangenheit so gefühlt? |   |   |   |   |                         |   |
|     | ①                                                                                                                                                                             | ② | ③ | ④ | ⑤ | ⑥                       | ⑦ |
|     | sehr oft                                                                                                                                                                      |   |   |   |   | sehr selten<br>oder nie |   |
| 11. | Wenn etwas passierte, hatten Sie dann im allgemeinen den Eindruck, dass Sie dessen Bedeutung ...                                                                              |   |   |   |   |                         |   |
|     | ①                                                                                                                                                                             | ② | ③ | ④ | ⑤ | ⑥                       | ⑦ |
|     | über- oder<br>unterschätzten                                                                                                                                                  |   |   |   |   | richtig<br>einschätzten |   |
| 12. | Wie oft haben Sie das Gefühl, dass die Dinge, die Sie im täglich Leben tun, wenig Sinn haben?                                                                                 |   |   |   |   |                         |   |
|     | ①                                                                                                                                                                             | ② | ③ | ④ | ⑤ | ⑥                       | ⑦ |
|     | sehr oft                                                                                                                                                                      |   |   |   |   | sehr selten<br>oder nie |   |
| 13. | Wie häufig haben Sie Gefühle, bei denen Sie sich nicht sicher sind, ob Sie die unter Kontrolle halten können?                                                                 |   |   |   |   |                         |   |
|     | ①                                                                                                                                                                             | ② | ③ | ④ | ⑤ | ⑥                       | ⑦ |
|     | sehr oft                                                                                                                                                                      |   |   |   |   | sehr selten<br>oder nie |   |

## **Gesundheitsverhalten**

Dieser Fragebogen bezieht sich auf Ihr Gesundheitsverhalten. Bitte kreuzen Sie die richtige Antwort an. Bitte nur 1 Antwort pro Frage.

### **1. Konsumieren Sie Alkohol von Zeit zu Zeit? (unter Alkohol wird verstanden: Bier, Wein, Spirituosen, Alkopops, ...)**

☐ **Nein**  
(Weiter zu Frage 4)

☐ **Ja**

**Falls ja, wie häufig?**

- ☐ Einmal im Monat oder weniger
- ☐ 2 bis 4 mal im Monat
- ☐ 2 bis 3 mal in Woche
- ☐ 4 mal in der Woche oder häufiger

**2. Wenn Sie Alkohol konsumieren, wieviel Gläser trinken Sie im Durchschnitt?**

- ☐ 1 bis 2
- ☐ 3 bis 4
- ☐ 5 bis 6
- ☐ 7 bis 9
- ☐ 10 oder mehr

**3. Wie häufig trinken Sie 6 oder mehr Gläser bei einer Gelegenheit?**

- ☐ Nie
- ☐ Seltener als einmal pro Monat
- ☐ Monatlich
- ☐ Wöchentlich
- ☐ Täglich oder fast täglich

**4. Rauchen Sie gelegentlich oder regelmässig Zigaretten?**

☐ Nein  
(Weiter zu Frage 7)

☐ Ja

**5. In den letzten 30 Tagen, an wieviel Tagen haben Sie Zigaretten geraucht?**

- ☐ An 1 bis 2 Tagen
- ☐ An 3 bis 5 Tagen
- ☐ An 6 bis 9 Tagen
- ☐ An 10 bis 19 Tagen
- ☐ An 20 bis 29 Tagen
- ☐ An allen 30 Tagen

**6. In den letzten 30 Tagen, an den Tagen an denen Sie geraucht haben, wieviel Zigaretten haben Sie pro Tag geraucht?**

- ☐ 1 Zigarette oder weniger pro Tag
- ☐ 2 bis 5 Zigaretten pro Tag
- ☐ 6 bis 10 Zigaretten pro Tag
- ☐ 11 bis 20 Zigaretten pro Tag
- ☐ Mehr als 20 Zigaretten pro Tag

**7. Wie oft, in den vergangenen 12 Monaten, haben Sie folgende Drogen/Medikamente konsumiert?**

|                                                        | Nie                   | Einmal pro Monat<br>oder weniger | 2 bis 4 mal<br>pro Monat | 2 mal pro<br>Woche oder<br>häufiger |
|--------------------------------------------------------|-----------------------|----------------------------------|--------------------------|-------------------------------------|
| a. Cannabis (Marihuana,<br>Haschisch)                  | <input type="radio"/> | <input type="radio"/>            | <input type="radio"/>    | <input type="radio"/>               |
| b. XTC (Ecstasy)                                       | <input type="radio"/> | <input type="radio"/>            | <input type="radio"/>    | <input type="radio"/>               |
| c. Kokain                                              | <input type="radio"/> | <input type="radio"/>            | <input type="radio"/>    | <input type="radio"/>               |
| d. Halluzinogene Pilze                                 | <input type="radio"/> | <input type="radio"/>            | <input type="radio"/>    | <input type="radio"/>               |
| e. Speed                                               | <input type="radio"/> | <input type="radio"/>            | <input type="radio"/>    | <input type="radio"/>               |
| f. Schlaftabletten, Sedativa oder<br>Beruhigungsmittel | <input type="radio"/> | <input type="radio"/>            | <input type="radio"/>    | <input type="radio"/>               |
| g. Andere Drogen:                                      | <input type="radio"/> | <input type="radio"/>            | <input type="radio"/>    | <input type="radio"/>               |

**8. Waren Sie im vergangenen Jahr beim Zahnarzt?**

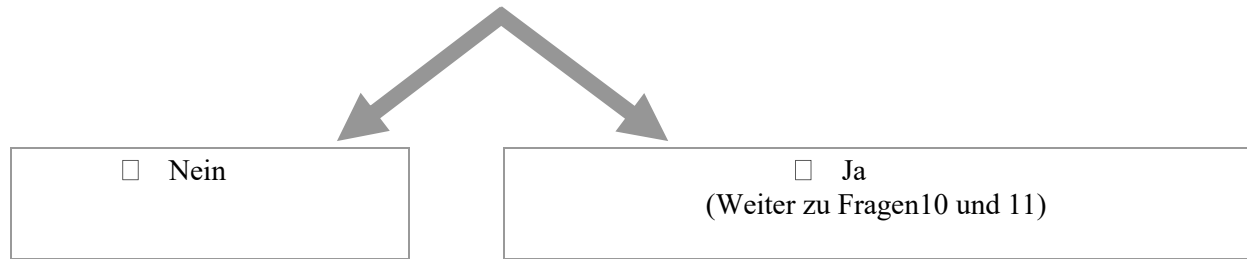

**9. Falls nein, wann waren Sie das letzte Mal beim Zahnarzt?**

- ☐ Ich gehe nie zum Zahnarzt
- ☐ Vor 1-2 Jahren
- ☐ Vor 2-3 Jahren
- ☐ Vor mehr als 3 Jahren

**10. Wie häufig putzen Sie sich Ihre Zähne?**

- ☐ Ich putze meine Zähne nicht
- ☐ Ich putze meine Zähne hin und wieder
- ☐ Einmal am Tag
- ☐ Zweimal am Tag
- ☐ Dreimal am Tag
- ☐ Häufiger als dreimal am Tag

**11. Wie häufig verwenden Sie Zahnseide?**

- ☐ Ich verwende keine Zahnseide
- ☐ Ich verwende Zahnseide hin und wieder
- ☐ Einmal pro Tag
- ☐ Zweimal pro Tag
- ☐ Dreimal pro Tag
- ☐ Häufiger als dreimal pro Tag

**12. Gehen Sie zu Fuss oder fahren Sie mit dem Velo regelmässig zur Schule oder an Ihren Arbeitsplatz?**

☐ Nein  
(Weiter zu Frage 14)

☐ Ja

**13. Falls ja, wie lange benötigen Sie mit dem Velo oder zu Fuss (hin und zurück)?**

- ☐ < 15 min
- ☐ 15-30 min
- ☐ 30-45 min
- ☐ > 45 min

**14. Üben Sie regelmässig einen Sport aus (dies beinhaltet Schulsport, aber NICHT die Velo-oder Fussstrecke zur Schule oder zum Arbeitsplatz)**

☐ Nein  
(der Fragebogen endet hier, bitte gehen Sie weiter zur nächsten Seite)

☐ Ja

**15. Während einer 7-Tage Woche, an wie viel Stunden üben Sie die folgenden körperlichen Aktivitäten aus?**

- a. Sport in der Schule, während dem Sportunterricht oder anderer Sport-Zeiten  
\_\_\_\_\_ Stunden/Woche
- b. Sportarten oder Aktivitäten, die körperlich sehr anspruchsvoll sind und Ihren Puls ansteigen lassen (z.B. Fussball, Langstreckenlauf, Basketball, Handball, Korbball, Squash, Rudern, Rugby, Hockey, Spinning, Thai Boxen, Kickboxen, Rennvelo fahren, Seilspringen, Mountainbiken, Tennis, ...)  
\_\_\_\_\_ Stunden/Woche
- c. Sportarten oder Aktivitäten, die körperlich mässig anspruchsvoll sind und Sie sich anschliessend nicht erschöpft und ausgebrannt fühlen (z.B. Joggen, Volleyball, Längenschwimmen, Ballett, Tanzen, Judo, Karate, Leichtathletik, Badminton, Baseball, Fitness-Stunden, Reiten, Sport-Klettern, ...)  
\_\_\_\_\_ Stunden/Woche
- d. Sportarten oder Aktivitäten mit minimaler körperlicher Anstrengung und leichten Belastungen (z.B. Billiard, Kegeln oder Bowling, Darts, Golf, Kartenspiele, Yoga, Fischen, ...)  
\_\_\_\_\_ Stunden/Woche

# ILLNESS PERCEPTION QUESTIONNAIRE (IPQ-R)

## Kurzform

Name.....

Datum.....

### KRANKHEITSANNAHMEN

Mit diesem Fragebogen sollen Ihre persönlichen Annahmen und Vermutungen über Ihre Beschwerden erfragt werden. Bitte kreuzen Sie die zutreffenden Antworten an. Bitte beantworten Sie alle Fragen.

Im folgenden sind verschiedene Beschwerden aufgelistet, die Sie möglicherweise im Verlauf Ihrer Krankheit erlebt haben. Bitte geben Sie durch Ankreuzen an, ob Sie die betreffenden Symptome im Verlauf Ihrer Krankheit erlebt haben und ob Sie glauben, dass diese Symptome durch Ihre Krankheit verursacht werden.

|                    | Ich habe dieses Symptom im<br>Verlauf meiner Krankheit erlebt |      | Dieses Symptom wird durch<br>meine Krankheit verursacht |      |
|--------------------|---------------------------------------------------------------|------|---------------------------------------------------------|------|
| Schmerzen          | Ja                                                            | Nein | Ja                                                      | Nein |
| Halsschmerzen      | Ja                                                            | Nein | Ja                                                      | Nein |
| Übelkeit           | Ja                                                            | Nein | Ja                                                      | Nein |
| Atemlosigkeit      | Ja                                                            | Nein | Ja                                                      | Nein |
| Gewichtsverlust    | Ja                                                            | Nein | Ja                                                      | Nein |
| Erschöpfung        | Ja                                                            | Nein | Ja                                                      | Nein |
| Gelenkschmerzen    | Ja                                                            | Nein | Ja                                                      | Nein |
| Brennende Augen    | Ja                                                            | Nein | Ja                                                      | Nein |
| Kurzatmigkeit      | Ja                                                            | Nein | Ja                                                      | Nein |
| Kopfschmerzen      | Ja                                                            | Nein | Ja                                                      | Nein |
| Verdauungsprobleme | Ja                                                            | Nein | Ja                                                      | Nein |
| Schlafstörungen    | Ja                                                            | Nein | Ja                                                      | Nein |
| Schwindel          | Ja                                                            | Nein | Ja                                                      | Nein |
| Kraftlosigkeit     | Ja                                                            | Nein | Ja                                                      | Nein |

Wir sind daran interessiert, zu erfahren, wie Sie momentan Ihre aktuellen Krankheitssymptome einschätzen. Bitte geben Sie dazu durch Ankreuzen der betreffenden Antworten an, wie sehr Sie den folgenden Aussagen zustimmen oder diese ablehnen.

|       |                                                                                           | STIMMT<br>ÜBERHAUPT<br>NICHT | STIMMT<br>NICHT | WEDER<br>NOCH | STIMMT | STIMMT<br>VOLL UND<br>GANZ |
|-------|-------------------------------------------------------------------------------------------|------------------------------|-----------------|---------------|--------|----------------------------|
| IP1   | Meine Erkrankung ist eher chronisch als nur kurzzeitig                                    |                              |                 |               |        |                            |
| IP2   | Meine Krankheit wird lange Zeit andauern                                                  |                              |                 |               |        |                            |
| IP3   | Ich nehme an, dass ich diese Krankheit für den Rest meines Lebens haben werde             |                              |                 |               |        |                            |
| IP4   | Meine Krankheit hat grosse Auswirkungen auf mein Leben                                    |                              |                 |               |        |                            |
| IP5   | Meine Krankheit hat grossen Einfluss darauf, wie andere Personen mich einschätzen         |                              |                 |               |        |                            |
| IP6   | Meine Krankheit verursacht auch Schwierigkeiten für mein soziales Umfeld                  |                              |                 |               |        |                            |
| IP7*  | Nichts was ich tue, wird meine Krankheit beeinflussen                                     |                              |                 |               |        |                            |
| IP8   | Ich habe die Macht, meine Krankheit zu beeinflussen                                       |                              |                 |               |        |                            |
| IP9*  | Mein Verhalten wird den Verlauf meiner Krankheit nicht beeinflussen                       |                              |                 |               |        |                            |
| IP10* | Meine Krankheit ist für mich ein Rätsel                                                   |                              |                 |               |        |                            |
| IP11* | Ich verstehe meine Krankheit nicht                                                        |                              |                 |               |        |                            |
| IP12* | Meine Krankheit macht für mich keinen Sinn                                                |                              |                 |               |        |                            |
| IP13  | Meine Symptome kommen und gehen in einem wiederkehrenden Muster                           |                              |                 |               |        |                            |
| IP14  | Meine Krankheit ist sehr unberechenbar                                                    |                              |                 |               |        |                            |
| IP15  | Meine Krankheit hat einen phasenhaften Verlauf, bei dem es mal besser, mal schlechter ist |                              |                 |               |        |                            |
| IP16  | Wenn ich über meine Krankheit nachdenke, fühle ich mich deprimiert                        |                              |                 |               |        |                            |
| IP17  | Es beunruhigt mich, wenn ich über meine Krankheit nachdenke                               |                              |                 |               |        |                            |
| IP18  | Es macht mich ängstlich, dass ich diese Krankheit habe                                    |                              |                 |               |        |                            |

## KRANKHEITSURSACHEN

Bitte geben Sie uns zuletzt noch an, welche drei Faktoren Ihrer Meinung nach am meisten verantwortlich für Ihre Krankheit sind.

Die wichtigsten Ursachen meiner Krankheit sind:

1. \_\_\_\_\_
2. \_\_\_\_\_
3. \_\_\_\_\_

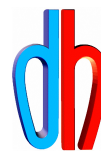

**Hat sich Ihr allgemeines Befinden nach der Herzoperation im DHM verbessert?**

- ☐ deutlich gebessert
- ☐ gering verbessert
- ☐ keine Änderung
- ☐ Verschlechterung des Befindens

**Verspüren Sie zur Zeit Atemnot (NYHA)**

- ☐ nach drei Stockwerken Treppensteigen
- ☐ nach einem Stockwerk Treppensteigen
- ☐ Gehen in der Ebene
- ☐ in Ruhe

**Sind Sie verheiratet / in einer festen Partnerschaft?**

☐ ja ☐ nein

**Haben Sie leibliche Kinder?**

☐ ja ☐ nein

**Welchen Ausbildungsstand haben Sie?**

- ☐ Studium
- ☐ Ausbildung
- ☐ keine Ausbildung nach Schulabschluss
- ☐ kein Schulabschluss

**Sind Sie berufstätig?**

- ☐ Ja, Vollzeit
- ☐ Ja, Teilzeit
- ☐ Nein, ich bin Hausfrau/Hausmann
- ☐ Nein, ich erhalte aktuell Krankengeld
- ☐ Nein, ich bin aktuell arbeitssuchend/arbeitslos
- ☐ Nein, ich bin in Rente

**Haben Sie einen Führerschein?** ☐ ja ☐ nein

**Haben Sie folgende Versicherungen?**

- ☐ Lebensversicherung
- ☐ Arbeitsunfähigkeitsversicherung

**Beziehen Sie Leistungen aus der Pflegeversicherung?**

- ☐ Nein
- ☐ Ja, ich habe Pflegestufe 0
- ☐ Ja, ich habe Pflegestufe 1
- ☐ Ja, ich habe Pflegestufe 2
- ☐ Ja, ich habe Pflegestufe 3
- ☐ Ja, aber ich kenne meine Pflegestufe nicht

**Sonstiges**

.....

.....

.....

.....

.....

**FU - Datum:** .....

**Unterschrift:** .....
