# Supplementary material for: Long-term patient-reported outcomes following congenital heart surgery in adults
Source: PubMed Central journal article supplement (PMC11668799; doi:10.3389/fcvm.2024.1501680), 2024-12-11
Supplement: Table1.pdf [file Table1.pdf]

## Supplementary Table 1

### Patient-related outcomes for assessment of quality of life

| Outcome                                          | Questionnaire                            | Component                                | Scope                                                           | Min Score | Max Score |
|--------------------------------------------------|------------------------------------------|------------------------------------------|-----------------------------------------------------------------|-----------|-----------|
| Perceived health status and Satisfaction of life | VR-12                                    | Mental Health                            | Emotions, vitality, mental and social functioning               | 0         | 100       |
|                                                  |                                          | Physical Health                          | Physical functioning, pain                                      | 0         | 100       |
|                                                  | EQ-5D-5L                                 | VAS                                      | Mobility, self-care, usual activities, pain, anxiety/depression | -0.661    | 1         |
|                                                  |                                          |                                          | Perceived health status                                         | 0         | 100       |
| SWLS                                             |                                          | Life satisfaction, subjective well-being | 5                                                               | 35        |           |
|                                                  |                                          |                                          |                                                                 |           |           |
| Psychological functioning                        | PHQ-8                                    |                                          | Depression                                                      | 0         | 24        |
|                                                  | SOC-13                                   |                                          | Orientation to life (stress management, coping, resilience)     | 13        | 91        |
| Health risk behaviors                            | HBS-CHD                                  | Substance use                            | Alcohol drinking, smoking, drug abuse                           | 0         | 100       |
|                                                  |                                          | Dental hygiene                           | Annual dental visit, daily brush, teeth floss                   | 0         | 100       |
|                                                  |                                          | Overall risk                             | Substance use, dental hygiene, sport participation              | 0         | 100       |
| Illness perception                               | IPQ-R                                    | Consequences                             | Illness impact on one's life                                    | 1         | 5         |
|                                                  |                                          | Emotional representations                | Negative emotions related to the illness                        | 1         | 5         |
|                                                  |                                          | Identity                                 | Attribution of symptoms specific to the illness                 | 0         | 28        |
|                                                  |                                          | Coherence                                | Understanding of the illness (cause, treatment)                 | 1         | 5         |
|                                                  |                                          | Personal Control                         | Self-efficacy to control symptoms                               | 1         | 5         |
|                                                  |                                          | Timeline acute/chronic                   | Perceived duration of illness (short $\frac{1}{2}$ long)        | 1         | 5         |
| Timeline cyclical                                | Perceived duration of illness (cyclical) | 1                                        | 5                                                               |           |           |

VR-12: Veterans RAND 12-item mental and physical scores, EQ-5D-5L: EuroQol 5-Dimension Level, SWLS: Satisfaction with Life Scale, PHQ-8: Patient Health Questionnaire, SOC-13: Sense of Coherence 13, HBS-CHD: Health-Behavior Scale–Congenital Heart Disease, IPQ-R: Illness Perception Questionnaire-Revised, VAS: visual analog scale. Blue and red values represent the best and worst scores, respectively, for each component of the questionnaires.
