# Supplementary material for: Long-term patient-reported outcomes following congenital heart surgery in adults
Source: PubMed Central journal article supplement (PMC11668799; doi:10.3389/fcvm.2024.1501680), 2024-12-11
Supplement: Table2.pdf [file Table2.pdf]

**Supplementary Table 2**

| <b>Primary Cardiac Diagnose</b>                     | <b>n (%)</b> |
|-----------------------------------------------------|--------------|
| ASD, secundum                                       | 34 (17.3)    |
| TOF                                                 | 22 (11.2)    |
| Aortic insufficiency and aortic stenosis            | 11 (5.6)     |
| Aortic stenosis, valvar                             | 11 (5.6)     |
| ASD, sinus venosus                                  | 10 (5.1)     |
| Aortic aneurysm                                     | 9 (4.6)      |
| Partial AVSD                                        | 8 (4.1)      |
| Coarctation of aorta                                | 6 (3.1)      |
| Ebstein's anomaly                                   | 6 (3.1)      |
| Pulmonary atresia, VSD                              | 6 (3.1)      |
| Mitral regurgitation                                | 6 (3.1)      |
| Aortic insufficiency                                | 5 (2.6)      |
| PAPVC                                               | 5 (2.6)      |
| TGA, IVS                                            | 5 (2.6)      |
| TGA, VSD-LVOTO                                      | 5 (2.6)      |
| Pulmonary stenosis, valvar                          | 4 (2.0)      |
| Perimembranous VSD                                  | 4 (2.0)      |
| TGA, VSD                                            | 3 (1.5)      |
| DORV, TGA type                                      | 3 (1.5)      |
| DORV, TOF type                                      | 3 (1.5)      |
| DORV, VSD type                                      | 2 (1)        |
| PFO                                                 | 2 (1)        |
| DCRV                                                | 2 (1)        |
| Pulmonary atresia, IVS                              | 2 (1)        |
| Single ventricle, DILV                              | 2 (1)        |
| Single ventricle, tricuspid atresia                 | 2 (1)        |
| Transitional AVSD                                   | 1 (0.5)      |
| Aortic stenosis, subvalvar                          | 1 (0.5)      |
| Congenitally corrected TGA                          | 1 (0.5)      |
| Anomalous aortic origin of coronary artery          | 1 (0.5)      |
| Abnormal left coronary artery from pulmonary artery | 1 (0.5)      |
| DOLV                                                | 1 (0.5)      |
| Double aortic arch                                  | 1 (0.5)      |
| Interrupted aortic arch                             | 1 (0.5)      |
| Mitral stenosis, valvar                             | 1 (0.5)      |
| PAPVC, scimitar                                     | 1 (0.5)      |
| Pulmonary insufficiency                             | 1 (0.5)      |
| Pulmonary stenosis, subvalvar                       | 1 (0.5)      |
| Pulmonary valve, other                              | 1 (0.5)      |
| Sinus of Valsalva aneurysm                          | 1 (0.5)      |
| TOF + AVSD                                          | 1 (0.5)      |
| Truncus arteriosus                                  | 1 (0.5)      |
| VSD + Coarctation of aorta                          | 1 (0.5)      |
| Infundibular VSD                                    | 1 (0.5)      |

ASD: atrium septum defect, TOF: tetralogy of Fallot, AVSD: atrioventricular septum defect, VSD: ventricular septum defect, PAPVC: partial anomaly of venous Connection, TGA: transposition of the great arteries, IVS: intact ventricular septum, LVOTO: left ventricular outflow tract obstruction, DORV: double-outlet right Ventricle, PFO: patent foramen ovale, DCRV: double-chambered right ventricle, DILV: double-inlet left ventricle, DOLV: double-outlet left ventricle
