# Supplementary material for: Long-term patient-reported outcomes following congenital heart surgery in adults
Source: PubMed Central journal article supplement (PMC11668799; doi:10.3389/fcvm.2024.1501680), 2024-12-11
Supplement: Table3.pdf [file Table3.pdf]

**Supplementary Table 3**

| <b>Cardiac Procedure in Adulthood</b>                 | <b>n (%)</b> |
|-------------------------------------------------------|--------------|
| ASD patch repair                                      | 31 (15.8)    |
| RV to PA conduit placement                            | 21 (10.7)    |
| Mitral calvuloplasty                                  | 20 (10.2)    |
| Conduit reoperation                                   | 12 (6.1)     |
| PAPVC repair                                          | 12 (6.1)     |
| Aortic valve replacement, mechanical                  | 10 (5.1)     |
| Aortic aneurysm repair                                | 9 (4.6)      |
| Tricuspid valvuloplasty                               | 8 (4.1)      |
| Aortic root replacement, valve sparing                | 7 (3.6)      |
| Aortic root replacement, mechanical                   | 6 (3.1)      |
| Ebstein's repair                                      | 6 (3.1)      |
| Aortic valve replacement, bioprosthetic               | 6 (3.1)      |
| Fontan revision or conversion (Re-do Fontan)          | 4 (2)        |
| Aortic valvuloplasty                                  | 4 (2)        |
| ASD primary closure                                   | 3 (1.5)      |
| Partial AVSD repair                                   | 3 (1.5)      |
| Aortic root replacement, bioprosthetic                | 3 (1.5)      |
| VSD patch repair                                      | 3 (1.5)      |
| Tricuspid valve replacement                           | 3 (1.5)      |
| Atrial baffle procedure (Mustard or Senning revision) | 2 (1)        |
| Coarctation repair, interposition graft               | 2 (1)        |
| PA reconstruction                                     | 2 (1)        |
| RVOT procedure                                        | 2 (1)        |
| Mitral valve replacement                              | 2 (1)        |
| Transitional AVSD repair                              | 1 (0.5)      |
| Left ventricular aneurysm repair                      | 1 (0.5)      |
| AAOCA repair                                          | 1 (0.5)      |
| ALCAPA repair                                         | 1 (0.5)      |
| Subvalvar aortic stenosis repair                      | 1 (0.5)      |
| Surgical ablation arrhythmia surgery (atrial)         | 1 (0.5)      |
| DCRV repair                                           | 1 (0.5)      |
| Konno procedure                                       | 1 (0.5)      |
| PAPVC scimitar repair                                 | 1 (0.5)      |
| Rastelli procedure                                    | 1 (0.5)      |
| Systemic to pulmonary Shunt                           | 1 (0.5)      |
| Aneurysm of sinus of Valsalva repair                  | 1 (0.5)      |
| TOF repair without ventriculotomy                     | 1 (0.5)      |
| Pulmonic valve replacement                            | 1 (0.5)      |
| Truncal valve replacement                             | 1 (0.5)      |

ASD: atrium septum defect, RV: right ventricle, PA: pulmonary Artery, PAPVC: partial anomaly of pulmonary venous connection, AVSD: atrioventricular septum defect, VSD: ventricle septum defect, RVOT: right ventricle outflow tract, AAOCA: anomalous aortic origin of the coronary artery from the

aorta, ALCAPA: anomalous origin of the coronary artery from the pulmonary artery, DCRV: double-chambered right ventricle, TOF: tetralogy of Fallot
